# Supplementary material for: Obesity and Overweight Among Children With Medical Complexity
Source: Oxford University Press journal article supplement (doi:10.1542/peds.2022-058687), 2022-12-27
Supplement: peds_2022058687supplementarydata.docx [file peds_2022058687supplementarydata.docx]

**Appendices**

Appendix 1. List of selected obesogenic medical conditions, by ICD-10 codes. (28–31)

ICD-10 code Condition

E240 Pituitary-dependent Cushing's disease

E242 Drug-induced Cushing's syndrome

E243 Ectopic ACTH syndrome

E248 Another Cushing's syndrome

E249 Cushing's syndrome, unspecified

E03.0, E3.1, E3.9, E3.8 Hypothyroidism

E23 Growth hormone deficiency

E23 hypopituitarism, panhypopituitarism

E20.1 Pseudohypoparathyroidism type 1a or Albright hereditary osteodystrophy

G47.35 Congenital central hypoventilation syndrome

Q87.11 Prader-Willi

Q90.0, Q90.1, Q90.2 Trisomy 21

Appendix 2. List of obesogenic medications (32-35)

Mirtazapine (Remeron Oral)

Mirtazapine (Remeron Po)

Mirtazapine (Remeron Sol-Tab) 15 Mg Disintegrating Tablet

Mirtazapine (Remeron) 15 Mg Tablet

Mirtazapine (Remeron) 15 Mg Tabs

Mirtazapine (Remeron) 30 Mg Tablet

Mirtazapine (Remeron) 45 Mg Tablet

Mirtazapine (Remeron) 7.5 Mg Tablet

Mirtazapine (Remeron) 7.5 Mg Tablet [Pharmacy Med Name: Mirtazapine 7.5mg Tab]

Mirtazapine (Remeron) 7.5 Mg Tablet [Pharmacy Med Name: Mirtazapine 7.5 Mg Tab Nort]

Mirtazapine (Remeron) 7.5 Mg Tablet [Pharmacy Med Name: Mirtazapine 7.5 Mg Tablet]

Mirtazapine (Remeron) 7.5 Mg Tablet [Pharmacy Med Name: Mirtazapine 7.5mg Tablets]

Mirtazapine 15 Mg Disintegrating Tablet

Mirtazapine 15 Mg Po Tabs

Mirtazapine 15 Mg Po Tbdl

Mirtazapine 15 Mg Tablet

Mirtazapine 30 Mg Tablet

Mirtazapine 45 Mg Disintegrating Tablet

Mirtazapine Po

Carbamazepine (Carbatrol) 300 Mg 12 Hr Capsule

Carbamazepine (Tegretol Xr) 100 Mg 12 Hr Tablet

Carbamazepine (Tegretol Xr) 200 Mg 12 Hr Tablet

Carbamazepine (Tegretol Oral)

Carbamazepine (Tegretol Po)

Carbamazepine (Tegretol Xr) 200 Mg 12 Hr Tablet

Carbamazepine (Tegretol Xr) 200 Mg Tb12

Carbamazepine (Tegretol) 100 Mg Chewable Tablet

Carbamazepine (Tegretol) 100 Mg Chewable Tablet [Pharmacy Med Name: Carbamazepine 100 Mg Tab Chew]

Carbamazepine (Tegretol) 100 Mg/5 Ml Oral Suspension

Carbamazepine (Tegretol) 100 Mg/5 Ml Oral Suspension [Pharmacy Med Name: Carbamazepine 100mg/5ml Shake Well]

Carbamazepine (Tegretol) 100 Mg/5 Ml Suspension

Carbamazepine (Tegretol) 200 Mg Tablet

Carbamazepine (Tegretol-Xr) 200 Mg Extended Release Tablet

Carbamazepine 100 Mg Chewable Tablet

Carbamazepine 100 Mg/5 Ml Po Susp

Carbamazepine 200 Mg Po Tb12

Carbamazepine 200 Mg Tablet

Carbamazepine 200 Mg/10 Ml Oral Suspension

Carbamazepine 400 Mg Po Tb12

Carbamazepine Er 100 Mg Tablet,Extended Release,12 Hr

Carbamazepine Er 200 Mg Tablet,Extended Release,12 Hr

Carbamazepine Oral

Divalproex (Depakote Er) 250 Mg 24 Hr Tablet

Divalproex (Depakote Er) 250 Mg 24 Hr Tablet [Pharmacy Med Name: Divalproex Sod Er 250 Mg Tab]

Divalproex (Depakote Er) 250 Mg 24 Hr Tablet [Pharmacy Med Name: Divalproex Tab 250mg Er]

Divalproex (Depakote Er) 500 Mg 24 Hr Tablet

Divalproex (Depakote Er) 500 Mg 24 Hr Tablet [Pharmacy Med Name: Divalproex Extended Release 500mg T]

Divalproex (Depakote Er) 500 Mg 24 Hr Tablet [Pharmacy Med Name: Divalproex Sod Er 500 Mg Tab]

Divalproex (Depakote Sprinkle) 125 Mg Capsule

Divalproex (Depakote Sprinkle) 125 Mg Capsule [Pharmacy Med Name: Divalproex 125mg Sprinkles]

Divalproex (Depakote Sprinkle) 125 Mg Capsule [Pharmacy Med Name: Divalproex Dr 125 Mg Cap Sprnk]

Divalproex (Depakote Sprinkle) 125 Mg Capsule [Pharmacy Med Name: Divalproex Sodium 125 Mg]

Divalproex (Depakote Sprinkle) 125 Mg Capsule [Pharmacy Med Name: Divalproex Sodium Oral Capsule Delayed Release Sprinkle 125 Mg]

Divalproex (Depakote Sprinkles) 125 Mg Capsule

Divalproex (Depakote Sprinkles) 125 Mg Cdrs

Divalproex (Depakote) 125 Mg Delayed Release Tablet

Divalproex (Depakote) 125 Mg Ec Tablet

Divalproex (Depakote) 125 Mg Ec Tablet [Pharmacy Med Name: Divalproex Sod Dr 125 Mg Tab]

Divalproex (Depakote) 125 Mg Ec Tablet [Pharmacy Med Name: Divalproex Sodium Dr 125mg Tab]

Divalproex (Depakote) 125 Mg Tbec

Divalproex (Depakote) 250 Mg Delayed Release Tablet

Divalproex (Depakote) 250 Mg Ec Tablet

Divalproex (Depakote) 250 Mg Ec Tablet [Pharmacy Med Name: Divalproex Sodium Dr 250 Mg Tab Unic]

Divalproex (Depakote) 250 Mg Extended Release Tablet

Divalproex (Depakote) 250 Mg Tbec

Divalproex (Depakote) 500 Mg Ec Tablet

Divalproex (Depakote) 500 Mg Extended Release Tablet

Divalproex 125 Mg Capsule,Delayed Release Sprinkle

Divalproex 125 Mg Po Cdrs

Divalproex 125 Mg Po Cpsp

Divalproex 125 Mg Po Tbec

Divalproex 125 Mg Sprinkle Capsule

Divalproex 125 Mg Tablet,Delayed Release

Divalproex 250 Mg Po Tb24

Divalproex 250 Mg Po Tbec

Divalproex 250 Mg Tablet,Delayed Release

Divalproex 500 Mg Po Tb24

Divalproex 500 Mg Po Tbec

Divalproex 500 Mg Tablet,Delayed Release

Divalproex Er 250 Mg Tablet,Extended Release 24 Hr

Divalproex Er 500 Mg Tablet,Extended Release 24 Hr

Divalproex Sodium (Depakote Oral)

Divalproex Sodium (Depakote Po)

Gabapentin (Neurontin Oral)

Gabapentin (Neurontin Po)

Gabapentin (Neurontin) 100 Mg Capsule

Gabapentin (Neurontin) 100 Mg Capsule [Pharmacy Med Name: Gabapentin 100 Mg Cap]

Gabapentin (Neurontin) 100 Mg Capsule [Pharmacy Med Name: Gabapentin 100 Mg Capsule]

Gabapentin (Neurontin) 100 Mg Capsule [Pharmacy Med Name: Gabapentin 100mg Capsules]

Gabapentin (Neurontin) 250 Mg/5 Ml Oral Solution

Gabapentin (Neurontin) 250 Mg/5 Ml Solution

Gabapentin (Neurontin) 250 Mg/5 Ml Solution [Pharmacy Med Name: Gabapentin 250 Mg/5 Ml Soln]

Gabapentin (Neurontin) 250 Mg/5 Ml Solution [Pharmacy Med Name: Gabapentin 250 Mg/5ml Sol Acel]

Gabapentin (Neurontin) 250 Mg/5 Ml Solution [Pharmacy Med Name: Gabapentin 250mg/5ml Solution]

Gabapentin (Neurontin) 300 Mg Capsule

Gabapentin (Neurontin) 300 Mg Capsule [Pharmacy Med Name: Gabapentin 300 Mg Cap Nort]

Gabapentin (Neurontin) 300 Mg Capsule [Pharmacy Med Name: Gabapentin 300 Mg Capsule]

Gabapentin (Neurontin) 300 Mg Capsule [Pharmacy Med Name: Gabapentin 300mg Cap]

Gabapentin (Neurontin) 300 Mg Capsule [Pharmacy Med Name: Gabapentin 300mg Cap]

Gabapentin (Neurontin) 300 Mg Capsule [Pharmacy Med Name: Gabapentin 300mg Capsules]

Gabapentin (Neurontin) 400 Mg Capsule

Gabapentin (Neurontin) 400 Mg Capsule [Pharmacy Med Name: Gabapentin 400mg Capsules]

Gabapentin (Neurontin) 600 Mg Tablet

Gabapentin (Neurontin) 600 Mg Tablet [Pharmacy Med Name: Gabapentin 600 Mg Tablet]

Gabapentin (Neurontin) 600 Mg Tablet [Pharmacy Med Name: Gabapentin 600mg Tablets]

Gabapentin (Neurontin) 800 Mg Tablet

Gabapentin 100 Mg Capsule

Gabapentin 100 Mg Po Caps

Gabapentin 250 Mg/5 Ml (5 Ml) Oral Solution

Gabapentin 250 Mg/5 Ml (5 Ml) Solution

Gabapentin 250 Mg/5 Ml Oral Solution

Gabapentin 250 Mg/5 Ml Po Soln

Gabapentin 300 Mg Capsule

Gabapentin 300 Mg Po Caps

Gabapentin 300 Mg/6 Ml (6 Ml) Oral Solution

Gabapentin 300 Mg/6 Ml (6 Ml) Po Soln

Gabapentin 400 Mg Capsule

Gabapentin 400 Mg Po Caps

Gabapentin 600 Mg Po Tabs

Gabapentin 600 Mg Tablet

Gabapentin Oral

Gabapentin Po

Valproate Ivpb

Valproate Ivpb (Vc)

Valproate Sodium 50 Mg/Ml In Ns Inj Dilution

Valproate Sodium 500 Mg/5 Ml (100 Mg/Ml) Iv Soln

Valproic Acid (As Sodium Salt) 250 Mg/5 Ml (5 Ml) Oral Solution

Valproic Acid (As Sodium Salt) 250 Mg/5 Ml (5 Ml) Po Soln

Valproic Acid (As Sodium Salt) 250 Mg/5 Ml Oral Solution

Valproic Acid (As Sodium Salt) 250 Mg/5 Ml Po Soln

Valproic Acid (As Sodium Salt) 250 Mg/5 Ml Po Syrp

Valproic Acid (Depakene) 250 Mg Capsule

Valproic Acid (Depakene) 250 Mg/5 Ml (5 Ml) Oral Solution

Valproic Acid (Depakene) 250 Mg/5 Ml Oral Solution

Valproic Acid (Depakene) 250 Mg/5 Ml Syrup

Valproic Acid (Depakene) 250 Mg/5 Ml Syrup [Pharmacy Med Name: Valproic Acd 250/5ml Sol]

Valproic Acid (Depakene) 250 Mg/5 Ml Syrup [Pharmacy Med Name: Valproic Acd Syp 250/5ml Liquid]

Valproic Acid (Depakene) 250 Mg/5 Ml Syrup [Pharmacy Med Name: Valproic Acid 250 Mg/5 Ml Soln]

Valproic Acid (Depakene) 250 Mg/5 Ml Syrup [Pharmacy Med Name: Valproic Acid 250/5ml Syrup]

Valproic Acid (Depakene) 250 Mg/5 Ml Syrup [Pharmacy Med Name: Valproic Acid 250mg/5ml Solution]

Valproic Acid 250 Mg Capsule

Valproic Acid Po

Valproic Acid, As Sodium Salt, (Depakene Oral)

Valproic Acid, As Sodium Salt, 250 Mg/5 Ml (5 Ml) Solution

Valproic Acid, As Sodium Salt, 250 Mg/5 Ml Syringe

Clozapine (Clozaril) 200 Mg Tablet

Clozapine (Clozaril) 25 Mg Tablet

Clozapine (Clozaril) 50 Mg Tablet

Clozapine (Fazaclo-Odt) 25 Mg Disintegrating Tablet

Clozapine 100 Mg Tablet

Clozapine 12.5 Mg Tablet, Rapid Dissolve

Olanzapine (Zyprexa) 10 Mg Tablet

Olanzapine (Zyprexa) 10 Mg Tablet [Pharmacy Med Name: Olanzapine 10 Mg Tablet]

Olanzapine (Zyprexa) 2.5 Mg Tablet

Olanzapine (Zyprexa) 5 Mg Tablet

Olanzapine (Zyprexa) 5 Mg Tablet [Pharmacy Med Name: Olanzapine 5mg Tablets]

Olanzapine (Zyprexa) 5 Mg Tabs

Olanzapine (Zyprexa) 7.5 Mg Tablet

Olanzapine (Zyprexa) Injection

Olanzapine 10 Mg Im Solr

Olanzapine 10 Mg Intramuscular Solution

Olanzapine 10 Mg Po Tabs

Olanzapine 10 Mg Po Tbdl

Olanzapine 2.5 Mg Po Tabs

Olanzapine 2.5 Mg Tablet

Olanzapine 5 Mg Disintegrating Tablet

Olanzapine 5 Mg Po Tabs

Olanzapine 5 Mg Po Tbdl

Olanzapine 5 Mg Tablet

Olanzapine 5 Mg/Ml Extemp Inj

Olanzapine Zydis (Zyprexa Zydis) 5 Mg Disintegrating Tablet

Olanzapine Zydis (Zyprexa) 10 Mg Disintegrating Tablet

Olanzapine Zydis (Zyprexa) 5 Mg Disintegrating Tablet

Quetiapine (Seroquel Xr) 150 Mg Tablet Extended Release 24 Hr

Quetiapine (Seroquel Xr) 200 Mg 24 Hr Tablet

Quetiapine (Seroquel Xr) 200 Mg Tb24

Quetiapine (Seroquel Xr) 300 Mg 24 Hr Tablet

Quetiapine (Seroquel Xr) 400 Mg 24 Hr Tablet

Quetiapine (Seroquel Xr) 400 Mg 24 Hr Tablet [Pharmacy Med Name: Quetiapine Er 400 Mg Tablet]

Quetiapine (Seroquel Xr) 50 Mg 24 Hr Tablet

Quetiapine (Seroquel Xr) 50 Mg Tb24

Quetiapine (Seroquel) 100 Mg Tablet

Quetiapine (Seroquel) 100 Mg Tablet [Pharmacy Med Name: Quetiapine Fumarate 100 Mg Tab]

Quetiapine (Seroquel) 100 Mg Tablet [Pharmacy Med Name: Quetiapine Fumarate Oral Tablet 100 Mg]

Quetiapine (Seroquel) 100 Mg Tabs

Quetiapine (Seroquel) 200 Mg Tablet

Quetiapine (Seroquel) 200 Mg Tablet [Pharmacy Med Name: Quetiapine 200mg Tablets]

Quetiapine (Seroquel) 25 Mg Tablet

Quetiapine (Seroquel) 25 Mg Tablet [Pharmacy Med Name: Quetiapine 25mg Tablets]

Quetiapine (Seroquel) 25 Mg Tablet [Pharmacy Med Name: Quetiapine Fumarate 25 Mg Tab]

Quetiapine (Seroquel) 300 Mg Tablet

Quetiapine (Seroquel) 300 Mg Tabs

Quetiapine (Seroquel) 50 Mg Tablet

Quetiapine (Seroquel) 50 Mg Tablet [Pharmacy Med Name: Quetiapine Fumarate 50 Mg Tab]

Quetiapine 100 Mg Po Tabs

Quetiapine 100 Mg Tablet

Quetiapine 200 Mg Po Tabs

Quetiapine 200 Mg Tablet

Quetiapine 25 Mg Po Tabs

Quetiapine 25 Mg Tablet

Quetiapine 50 Mg Po Tabs

Quetiapine 50 Mg Po Tb24

Quetiapine Er 50 Mg Tablet,Extended Release 24 Hr

Quetiapine Fumarate (Quetiapine Oral)

Quetiapine Fumarate (Seroquel Po)

Risperdal 0.25 Mg Tablet

Risperdal 0.5 Mg Tablet

Risperdal 1 Mg/Ml Oral Solution

Risperdal Consta 50 Mg/2 Ml Injection

Risperidone (Risperdal M-Odt) 0.25 Mg Tablet, Rapid Dissolve

Risperidone (Risperdal M-Odt) 0.25 Mg Tablet, Rapid Dissolve [Pharmacy Med Name: Risperidone 0.25 Mg Odt]

Risperidone (Risperdal M-Tab) 0.5 Mg Disintegrating Tablet

Risperidone (Risperdal M-Tabs) 1 Mg Disintegrating Tablet

Risperidone (Risperdal M-Tabs) 2 Mg Disintegrating Tablet

Risperidone (Risperdal Oral)

Risperidone (Risperdal Po)

Risperidone (Risperdal) 0.25 Mg Tablet

Risperidone (Risperdal) 0.25 Mg Tablet [Pharmacy Med Name: Risperidone 0.25 Mg Tablet]

Risperidone (Risperdal) 0.5 Mg Tablet

Risperidone (Risperdal) 0.5 Mg Tablet [Pharmacy Med Name: Risperidone 0.5 Mg Tab Ajan]

Risperidone (Risperdal) 0.5 Mg Tablet [Pharmacy Med Name: Risperidone 0.5 Mg Tablet]

Risperidone (Risperdal) 0.5 Mg Tablet [Pharmacy Med Name: Risperidone 0.5mg Tablets]

Risperidone (Risperdal) 1 Mg Tablet

Risperidone (Risperdal) 1 Mg Tablet [Pharmacy Med Name: Risperidone 1 Mg Tablet]

Risperidone (Risperdal) 1 Mg Tablet [Pharmacy Med Name: Risperidone Oral Tablet 1 Mg]

Risperidone (Risperdal) 1 Mg/Ml Oral Solution

Risperidone (Risperdal) 1 Mg/Ml Oral Solution [Pharmacy Med Name: Risperidone 1 Mg/Ml Soln 1 Soln]

Risperidone (Risperdal) 1 Mg/Ml Oral Solution [Pharmacy Med Name: Risperidone 1 Mg/Ml Solution]

Risperidone (Risperdal) 1 Mg/Ml Oral Solution [Pharmacy Med Name: Risperidone 1mg/Ml Oral Soln 30ml]

Risperidone (Risperdal) 1 Mg/Ml Soln

Risperidone (Risperdal) 2 Mg Tablet

Risperidone (Risperdal) 2 Mg Tablet [Pharmacy Med Name: Risperidone Oral Tablet 2 Mg]

Risperidone (Risperdal) 3 Mg Tablet

Risperidone (Risperdal) 3 Mg Tabs

Risperidone (Risperdal) 4 Mg Tablet

Risperidone 0.25 Mg Disintegrating Tablet

Risperidone 0.25 Mg Po Tabs

Risperidone 0.25 Mg Po Tbdl

Risperidone 0.25 Mg Tablet

Risperidone 0.25 Mg Tbdl

Risperidone 0.5 Mg Disintegrating Tablet

Risperidone 0.5 Mg Po Tabs

Risperidone 0.5 Mg Po Tbdl

Risperidone 0.5 Mg Tablet

Risperidone 1 Mg Po Tabs

Risperidone 1 Mg Tablet

Risperidone 1 Mg/Ml Oral Solution

Risperidone 1 Mg/Ml Po Soln

Risperidone 2 Mg Disintegrating Tablet

Risperidone 2 Mg Po Tbdl

Risperidone 3 Mg Disintegrating Tablet

Risperidone Microspheres (Risperdal Consta) 50 Mg/2 Ml Injection

Risperidone Po

Lithium (Eskalith) 450 Mg Cr Tablet

Lithium (Lithobid) 300 Mg Cr Tablet

Lithium (Lithobid) 300 Mg Cr Tablet [Pharmacy Med Name: Lithium Carbonate Er 300 Mg Tb]

Lithium (Lithobid) 300 Mg Cr Tablet [Pharmacy Med Name: Lithium Carbonate Er 300mg Tablets]

Lithium 150 Mg Capsule

Lithium 300 Mg Capsule

Lithium 300 Mg Controlled Release Tablet

Lithium 300 Mg Tablet

Lithium 300 Mg Tablet [Pharmacy Med Name: Lithium Carbonate 300mg Tablets]

Lithium 450 Mg Controlled Release Tablet

Lithium 450 Mg Controlled Release Tablet [Pharmacy Med Name: Lithium Carbonate Er 450 Mg Tb]

Lithium 600 Mg Capsule

Lithium 600 Mg Capsule [Pharmacy Med Name: Lithium Carbonate 600 Mg Cap]

Lithium Carbonate 150 Mg Capsule

Lithium Carbonate 150 Mg Po Caps

Lithium Carbonate 300 Mg Capsule

Lithium Carbonate 300 Mg Po Tabs

Lithium Carbonate 300 Mg Po Tbsr

Lithium Carbonate 300 Mg Tablet

Lithium Carbonate 450 Mg Po Tbsr

Lithium Carbonate Er 300 Mg Tablet,Extended Release

Lithium Carbonate Er 450 Mg Tablet,Extended Release

Lithium Carbonate Po

Lithium Citrate 8 Meq/5 Ml (5 Ml) Solution

Lithium Citrate 8 Meq/5 Ml Oral Solution

Lithium Citrate Po

Lithobid 300 Mg Cr Tablet

Medroxyprogesterone (Depo-Provera) 150 Mg/Ml Injection

Medroxyprogesterone (Depo-Provera) 150 Mg/Ml Syringe Injection

Medroxyprogesterone (Depo-Subq Provera 104) 104 Mg/0.65 Ml Injection

Medroxyprogesterone (Depo-Subq Provera) 104 Mg/0.65 Ml Injection

Medroxyprogesterone 150 Mg/Ml Im Extemp

Medroxyprogesterone 150 Mg/Ml Im Susp

Medroxyprogesterone 150 Mg/Ml Intramuscular Suspension

Medroxyprogesterone 150 Mg/Ml Intramuscular Syringe

Medroxyprogesterone, Contraceptive, (Depo-Provera) 150 Mg/Ml Im Injection

Medroxyprogesterone,Contracep, 150 Mg/Ml Syrg

Betamethasone Acet & Sod Phos (Celestone) 6 Mg/Ml Extemp Inj

Betamethasone Acet & Sod Phos 6 Mg/Ml Susp Extemp Inj

Betamethasone Acet,Sod Phos 6 Mg/Ml Inj Susp

Betamethasone Acetate And Sodium Phos 6 Mg/Ml Suspension For Injection

Betamethasone Acetate-Betamethasone Sodium Phosphate (Celestone) 6 Mg/Ml Inj

Budesonide (Entocort Ec Oral)

Budesonide (Entocort Ec) 3 Mg 24 Hr Capsule

Budesonide (Entocort Ec) 3 Mg Enteric Coated Capsule

Budesonide (Uceris) 9 Mg Tablet, Delayed & Ext.Release 24 Hr Tablet

Budesonide (Uceris) 9 Mg Tade

Budesonide 3 Mg Po Cecx

Budesonide 9 Mg Tade

Budesonide 9 Mg Tade [Pharmacy Med Name: Budesonide Er 9 Mg Tab]

Budesonide Dr & Er 3 Mg Capsule,Delayed & Extended Release

Budesonide Dr & Er 3 Mg Capsule,Delayed,Extended Release

Budesonide Dr - Er 3 Mg Capsule,Delayed,Extended Release

Budesonide Dr-Er 9 Mg Tablet,Delayed And Extended Release

Budesonide Oral

Cortef 10 Mg Tablet

Cortef 5 Mg Tablet

Deflazacort (Emflaza) 30 Mg Tablet

Deflazacort (Emflaza) 36 Mg Tablet

Deflazacort 18 Mg Tablet

Deflazacort 22.75 Mg/Ml Suspension

Deflazacort 30 Mg Tablet

Deflazacort 36 Mg Tablet

Deflazacort 36 Mg Tabs

Deflazacort 6 Mg Tablet

Dexamethasone (Custom Dose) Ivpb

Dexamethasone (Decadron Po)

Dexamethasone (Decadron) 0.5 Mg Tablet

Dexamethasone (Decadron) 0.5 Mg/5 Ml Elixir

Dexamethasone (Decadron) 0.5 Mg/5 Ml Oral Elixir

Dexamethasone (Decadron) 0.75 Mg Tablet

Dexamethasone (Decadron) 1 Mg Tablet

Dexamethasone (Decadron) 1 Mg Tablet [Pharmacy Med Name: Dexamethasone 1 Mg Tablet]

Dexamethasone (Decadron) 1 Mg/Ml Drops Solution

Dexamethasone (Decadron) 1 Mg/Ml Oral Drops

Dexamethasone (Decadron) 1.5 Mg Tablet

Dexamethasone (Decadron) 10 Mg/Ml

Dexamethasone (Decadron) 10 Mg/Ml Injection

Dexamethasone (Decadron) 2 Mg Tablet

Dexamethasone (Decadron) 4 Mg Tablet

Dexamethasone (Decadron) 4 Mg Tablet [Pharmacy Med Name: Dexamethasone 4 Mg Tablet]

Dexamethasone (Decadron) 4 Mg Tablet [Pharmacy Med Name: Dexamethasone 4mg Tab#100 Hikma* 4 Tablet]

Dexamethasone (Decadron) 4 Mg Tabs

Dexamethasone (Decadron) 4 Mg/Ml

Dexamethasone (Decadron) 4 Mg/Ml Inj

Dexamethasone (Decadron) 4 Mg/Ml Injection

Dexamethasone (Decadron) 6 Mg Tablet

Dexamethasone (Decadron) 6 Mg Tabs

Dexamethasone (Decadron) Tablet

Dexamethasone (Decadron) Tablet 1.75 Mg

Dexamethasone (Decadron) Tablet 10 Mg

Dexamethasone (Decadron) Tablet 16 Mg

Dexamethasone (Decadron) Tablet 16.5 Mg

Dexamethasone (Decadron) Tablet 2.25 Mg

Dexamethasone (Decadron) Tablet 2.375 Mg

Dexamethasone (Decadron) Tablet 2.5 Mg

Dexamethasone (Decadron) Tablet 2.75 Mg

Dexamethasone (Decadron) Tablet 3.25 Mg

Dexamethasone (Decadron) Tablet 3.5 Mg

Dexamethasone (Decadron) Tablet 3.75 Mg

Dexamethasone (Decadron) Tablet 4.5 Mg

Dexamethasone (Decadron) Tablet 4.75 Mg

Dexamethasone (Decadron) Tablet 5 Mg

Dexamethasone (Decadron) Tablet 5.5 Mg

Dexamethasone (Decadron) Tablet 5.75 Mg

Dexamethasone (Decadron) Tablet 6.25 Mg

Dexamethasone (Decadron) Tablet 6.5 Mg

Dexamethasone (Decadron) Tablet 6.75 Mg

Dexamethasone (Decadron) Tablet 7 Mg

Dexamethasone (Decadron) Tablet 7.625 Mg

Dexamethasone (Decadron) Tablet 8.6875 Mg

Dexamethasone (Decadron) Tablet 9.25 Mg

Dexamethasone (Dexamethasone Intensol) 1 Mg/Ml Drop

Dexamethasone 0.5 Mg Po Tabs

Dexamethasone 0.5 Mg Tablet

Dexamethasone 0.5 Mg/5 Ml Oral Elixir

Dexamethasone 0.5 Mg/5 Ml Oral Solution

Dexamethasone 0.5 Mg/5 Ml Po Elix

Dexamethasone 0.5 Mg/5 Ml Solution

Dexamethasone 0.5 Mg/5 Ml Solution [Pharmacy Med Name: Dexamethasone 0.5mg/5ml Soln 0.5 Milliliter]

Dexamethasone 0.5 Mg/Ml In Ns Inj Dilution

Dexamethasone 1 Mg Po Tabs

Dexamethasone 1 Mg Tablet

Dexamethasone 1 Mg/Ml Drops (Concentrate)

Dexamethasone 1 Mg/Ml In Ns Inj Dilution

Dexamethasone 1 Mg/Ml Oral Soln (Non Dual Sign)

Dexamethasone 1 Mg/Ml Pediatric Iv Syringe (Vc)

Dexamethasone 1 Mg/Ml Po Drop

Dexamethasone 1 Mg/Ml Solution

Dexamethasone 1.5 Mg Po Tabs

Dexamethasone 1.5 Mg Tablet

Dexamethasone 10 Mg/Ml Extemp Inj

Dexamethasone 10 Mg/Ml Extemp Inj (For Po Use)

Dexamethasone 10 Mg/Ml Extemp Inj (Non-Dual Sign)

Dexamethasone 10 Mg/Ml Injection Solution

Dexamethasone 2 Mg Po Tabs

Dexamethasone 2 Mg Tablet

Dexamethasone 4 Mg Po Tabs

Dexamethasone 4 Mg Tablet

Dexamethasone 4 Mg/Ml Extemp Inj

Dexamethasone 4 Mg/Ml Extemp Inj (Non Dual Sign)

Dexamethasone 4 Mg/Ml Injection Solution

Dexamethasone 6 Mg Tabs

Dexamethasone Ivpb (Mixture)

Dexamethasone Po

Dexamethasone Sodium Phos (Pf) 10 Mg/Ml Inj Soln

Dexamethasone Sodium Phos (Pf) 10 Mg/Ml Oral Order (Vc)

Dexamethasone Sodium Phosphate (Pf) 10 Mg/Ml Injection Solution

Dexamethasone Sodium Phosphate 0.4 % Soln

Dexamethasone Sodium Phosphate 10 Mg/Ml Croup Order

Dexamethasone Sodium Phosphate 10 Mg/Ml Inj Soln

Dexamethasone Sodium Phosphate 10 Mg/Ml Injection Solution

Dexamethasone Sodium Phosphate 4 Mg/Ml Croup Order

Dexamethasone Sodium Phosphate 4 Mg/Ml Inj Soln

Dexamethasone Sodium Phosphate 4 Mg/Ml Injection Solution

Dexamethasone Sodium Phosphate 4 Mg/Ml Syringe

Dexamethasone Sodium Phosphate 4mg/Ml Inj Croup Order

Emflaza 30 Mg Tablet

Emflaza 6 Mg Tablet

Entocort Ec 3 Mg Enteric Coated Capsule

Hydrocortisone (Cortef Po)

Hydrocortisone (Cortef) 10 Mg Tablet

Hydrocortisone (Cortef) 10 Mg Tablet [Pharmacy Med Name: Hydrocortisone 10 Mg Tablet]

Hydrocortisone (Cortef) 10 Mg Tablet [Pharmacy Med Name: Hydrocortisone 10mg Tabs]

Hydrocortisone (Cortef) 2 Mg/Ml Cpd Suspension

Hydrocortisone (Cortef) 2 Mg/Ml Suspension

Hydrocortisone (Cortef) 20 Mg Tablet

Hydrocortisone (Cortef) 20 Mg Tablet [Pharmacy Med Name: Hydrocortisone 20mg Tab Ven#100* 20 Mg Tablet]

Hydrocortisone (Cortef) 5 Mg Tablet

Hydrocortisone (Cortef) 5 Mg Tablet [Pharmacy Med Name: Hydrocortisone 5 Mg Tablet]

Hydrocortisone (Cortef) 5 Mg Tablet [Pharmacy Med Name: Hydrocortisone 5mg Tablets]

Hydrocortisone (Cortef) 5 Mg Tablet [Pharmacy Med Name: Hydrocortisone Tabs 5mg]

Hydrocortisone (Cortef) 5 Mg Tabs

Hydrocortisone (Cortef) Tablet 15 Mg

Hydrocortisone (Pf) (Solu-Cortef Act-O-Vial) 100 Mg/2 Ml Inj

Hydrocortisone (Pf) In Sodium Chloride 0.9% Infusion

Hydrocortisone (Solu-Cortef) 100 Mg Recon Soln

Hydrocortisone 1 Mg Capsule, Sprinkle

Hydrocortisone 10 Mg Po Tabs

Hydrocortisone 10 Mg Tablet

Hydrocortisone 100 Mg Solution For Injection

Hydrocortisone 2 Mg/Ml (20/Greenstone) Cpd Oral Suspension

Hydrocortisone 2 Mg/Ml Cpd Suspension

Hydrocortisone 2 Mg/Ml Oral Suspension

Hydrocortisone 2 Mg/Ml Oral Suspension (Inpt Only)

Hydrocortisone 20 Mg Po Tabs

Hydrocortisone 20 Mg Tablet

Hydrocortisone 5 Mg Po Tabs

Hydrocortisone 5 Mg Tablet

Hydrocortisone Ivpb

Hydrocortisone Oral

Hydrocortisone Pediatric Iv Infusion

Hydrocortisone Po

Hydrocortisone Sod Succ (Pf) (Solu-Cortef Act-O-Vial) 100 Mg/2 Ml Inj

Hydrocortisone Sod Succ (Pf) 100 Mg/2 Ml Inj Solr

Hydrocortisone Sod Succ (Pf) 125 Mg/Ml Extemp Inj

Hydrocortisone Sod Succ (Pf) 50 Mg/Ml Extemp Injection

Hydrocortisone Sod Succ 1 Mg/Ml Ns Dilution

Hydrocortisone Sod Succ 10 Mg/Ml Ns Dilution

Hydrocortisone Sod Succ, Pf, (Solu-Cortef Act-O-Vial) 100 Mg/2 Ml Recon Soln

Hydrocortisone Sod Succ, Pf, (Solu-Cortef Act-O-Vial) 100 Mg/2 Ml Recon Soln Injection

Hydrocortisone Sod Succ, Pf, (Solu-Cortef) 50 Mg/Ml Recon Soln

Hydrocortisone Sod Succ, Pf, (Solu-Cortef, Pf,) 100 Mg/2 Ml Recon Soln

Hydrocortisone Sod Succ, Pf, (Solu-Cortef, Pf,) 100 Mg/2 Ml Recon Soln Injection

Hydrocortisone Sod Succ, Pf, (Solu-Cortef, Pf,) 250 Mg/2 Ml Recon Soln

Hydrocortisone Sod Succinate (Pf) 1,000 Mg/8 Ml Solution For Injection

Hydrocortisone Sod Succinate (Pf) 100 Mg/2 Ml Solution (Code)

Hydrocortisone Sod Succinate (Pf) 100 Mg/2 Ml Solution For Injection

Hydrocortisone Sod Succinate (Pf) 250 Mg/2 Ml Solution For Injection

Hydrocortisone Sod Succinate (Pf) 500 Mg/4 Ml Solution For Injection

Hydrocortisone Sod Succinate (Solu-Cortef Inj)

Hydrocortisone Sod Succinate (Solu-Cortef) 100 Mg Recon Soln

Hydrocortisone Sod Succinate (Solu-Cortef) 100 Mg Solr

Hydrocortisone Sod Succinate 100 Mg Inj Solr

Hydrocortisone Sodium Succ/Pf (Hydrocortisone Sod Succ, Pf, Inj)

Hydrocortisone Sodium Succinate 100 Mg Solution For Injection

Hydrocortisone, Pf, (Solu-Cortef Act-O-Vial) 100 Mg/2 Ml Injection

Hydrocortisone, Pf, (Solu-Cortef Act-O-Vial) 100 Mg/2 Ml Recon Soln Injection

Hydrocortisone, Pf, (Solu-Cortef) 100 Mg/2 Ml Injection

Hydrocortisone, Pf, (Solu-Cortef) 50 Mg/Ml Recon Soln

Hydrocortisone, Pf, (Solu-Cortef, Pf,) 100 Mg/2 Ml Recon Soln Injection

Hydrocortisone, Pf, (Solu-Cortef, Pf,) 100 Mg/2 Ml Solr

Hydrocortisone, Pf, (Solu-Cortef, Pf,) 250 Mg/2 Ml Recon Soln

Lidocaine 1% + Triamcinolone-Ac Mixture (Or Documentation)

Medrol, Pak, 4 Mg Tablet

Methylprednisolone (Medrol Dosepack) 4 Mg Tablet

Methylprednisolone (Medrol) 16 Mg Tablet

Methylprednisolone (Medrol) 32 Mg Tablet

Methylprednisolone (Medrol) 4 Mg Tablet

Methylprednisolone (Medrol) 8 Mg Tablet

Methylprednisolone (Medrol, Pak,) 4 Mg Tablet

Methylprednisolone (Pf) (Solu-Medrol Act-O-Vial) 125 Mg/2 Ml Inj

Methylprednisolone (Pf) In Sodium Chloride 0.9% Infusion

Methylprednisolone 1 Mg/Ml In Ns Dilution

Methylprednisolone 10 Mg/Ml In Ns Dilution

Methylprednisolone 16 Mg Po Tabs

Methylprednisolone 16 Mg Tablet

Methylprednisolone 4 Mg Po Tabs

Methylprednisolone 4 Mg Tablet

Methylprednisolone Acetate (Depo-Medrol Inj)

Methylprednisolone Acetate (Depo-Medrol) 40 Mg/Ml Injection

Methylprednisolone Acetate 40 Mg/Ml Suspension For Injection

Methylprednisolone Acetate 80 Mg/Ml Inj Susp

Methylprednisolone Iv In 100 Ml D5w

Methylprednisolone Iv In 100 Ml Ns

Methylprednisolone Ivpb

Methylprednisolone Ivpb (30 Min Duration)

Methylprednisolone Ivpb (60 Min Duration)

Methylprednisolone Pediatric Iv Infusion

Methylprednisolone Sod Suc(Pf) 125 Mg/2 Ml Inj Solr

Methylprednisolone Sod Suc(Pf) 40 Mg/Ml Inj Solr

Methylprednisolone Sod Suc,Pf, 500 Mg/4 Ml Recon Soln

Methylprednisolone Sod Succ (Pf) 125 Mg/2 Ml Solution (Code)

Methylprednisolone Sod Succ (Pf) 125 Mg/2 Ml Solution For Injection

Methylprednisolone Sod Succ (Pf) 40 Mg/Ml Solution For Injection

Methylprednisolone Sod Succ (Solu-Medrol Iv)

Methylprednisolone Sod Succ (Solu-Medrol) 62.5 Mg/Ml Injection

Methylprednisolone Sodium Succ 125 Mg Inj Solr

Methylprednisolone Sodium Succ 125 Mg Solution For Injection

Methylprednisolone Sodium Succ 125 Mg/2 Ml Inj Solr

Methylprednisolone Sodium Succ 40 Mg Inj Solr

Methylprednisolone Sodium Succ 40 Mg/Ml Extemp Inj

Methylprednisolone Sodium Succ 40 Mg/Ml Inj Solr

Methylprednisolone Sodium Succ 62.5 Mg/Ml Extemp Inj

Methylprednisolone Sodium Succinate (Solu-Medrol) 1,000 Mg Inj

Methylprednisolone Sodium Succinate (Solu-Medrol) 500 Mg Inj

Methylprednisolone Sodium Succinate 1,000 Mg Intravenous Solution

Methylprednisolone Sodium Succinate 125 Mg Solution For Injection

Methylprednisolone Sodium Succinate 250 Mg/21 Mls In Sodium Chloride 0.9% Infusion

Methylprednisolone Sodium Succinate 40 Mg Solution For Injection

Methylprednisolone Sodium Succinate 5 Mg/Ml In Dextrose 5% Solution

Methylprednisolone Sodium Succinate 500 Mg Intravenous Solution

Methylprednisolone, Pf, (Solu-Medrol, Pf,) 125 Mg/2 Ml Recon Soln

Ns 0.9 % Solp 250 Ml With Methylprednisolone 1,000 Mg/8 Ml Solr 5,000 Mg

Prednisolone (Orapred Odt) 10 Mg Disintegrating Tablet

Prednisolone (Orapred Odt) 15 Mg Disintegrating Tablet

Prednisolone (Orapred Odt) 30 Mg Disintegrating Tablet

Prednisolone (Orapred) 15 Mg/5 Ml Soln

Prednisolone (Orapred) 15 Mg/5 Ml Solution

Prednisolone (Orapred) 3 Mg/Ml Solution

Prednisolone (Orapred) 3 Mg/Ml Solution [Pharmacy Med Name: Prednisolone 15mg/5ml Solution 15 Bottle]

Prednisolone (Orapred) 3 Mg/Ml Solution [Pharmacy Med Name: Prednisolone 15mg/5ml Solution]

Prednisolone (Orapred) 3 Mg/Ml Solution [Pharmacy Med Name: Prednisolone Sod 15mg/5ml Soln]

Prednisolone (Orapred) 3 Mg/Ml Solution [Pharmacy Med Name: Prednisolone Sod Phos15mg/5ml Paa* 15 Mg/5ml Milliliter]

Prednisolone (Prelone) 15 Mg/5 Ml Oral Solution

Prednisolone (Prelone) 3 Mg/Ml Syrup

Prednisolone (Prelone) 3 Mg/Ml Syrup [Pharmacy Med Name: Prednisolone 15 Mg/5 Ml Soln]

Prednisolone (Prelone) 3 Mg/Ml Syrup [Pharmacy Med Name: Prednisolone 15mg/5ml Liq]

Prednisolone 15 Mg/5 Ml Oral Prepack

Prednisolone 15 Mg/5 Ml Oral Solution

Prednisolone 15 Mg/5 Ml Po Soln

Prednisolone 15 Mg/5 Ml Solution

Prednisolone 3 Mg/Ml Solution

Prednisolone 5 Mg (48 Tabs) Tablets, Dose Pack

Prednisolone 5 Mg Tablet

Prednisolone Acetate 15 Mg/5 Ml Susp

Prednisolone Oral

Prednisolone Po

Prednisolone Sod Phosphate (Orapred Oral)

Prednisolone Sod Phosphate (Prednisolone Sodium Phosphate) 15 Mg/5 Ml (5 Ml) Soln

Prednisolone Sod Phosphate (Prednisolone Sodium Phosphate) 15 Mg/5 Ml (5 Ml) Solution

Prednisolone Sodium Phosphate (Orapred Odt) 15 Mg Tbdl

Prednisolone Sodium Phosphate (Pediapred) 5 Mg Base/5 Ml (6.7 Mg/5 Ml) Solution

Prednisolone Sodium Phosphate 10 Mg/5 Ml Solution

Prednisolone Sodium Phosphate 15 Mg/5 Ml (3 Mg/Ml) Oral Solution

Prednisolone Sodium Phosphate 15 Mg/5 Ml (3 Mg/Ml) Po Soln

Prednisolone Sodium Phosphate 15 Mg/5 Ml (5 Ml) Oral Solution

Prednisolone Sodium Phosphate 15 Mg/5 Ml (5 Ml) Solution

Prednisolone Sodium Phosphate 15 Mg/5 Ml Oral Solution

Prednisolone Sodium Phosphate 15 Mg/5 Ml Po Soln

Prednisolone Sodium Phosphate 25 Mg/5 Ml (5 Mg/Ml) Solution

Prednisolone Sodium Phosphate 5 Mg Base/5 Ml (6.7 Mg/5 Ml) Po Soln

Prednisone (Deltasone) 1 Mg Tablet

Prednisone (Deltasone) 1 Mg Tablet [Pharmacy Med Name: Prednisone 1 Mg Tablet]

Prednisone (Deltasone) 10 Mg Tablet

Prednisone (Deltasone) 10 Mg Tablet Pack

Prednisone (Deltasone) 10 Mg Tablet [Pharmacy Med Name: Prednisone 10mg** Tablets]

Prednisone (Deltasone) 2.5 Mg Tablet

Prednisone (Deltasone) 20 Mg Tablet

Prednisone (Deltasone) 5 Mg Tablet

Prednisone (Deltasone) 50 Mg Tablet

Prednisone (Deltasone) 50 Mg Tablet [Pharmacy Med Name: Prednisone 50mg (Fifty Mg) Tablets]

Prednisone (Prednisone) 5 Mg/Ml Concentrate Solution

Prednisone 1 Mg Po Tabs

Prednisone 1 Mg Tablet

Prednisone 1 Mg Tablet [Pharmacy Med Name: Prednisone 1 Mg Tablet Par #1000* 1 Tablet]

Prednisone 1 Mg Tablet [Pharmacy Med Name: Prednisone 1 Mg Tablet Par #1000* 1 Mg Tablet]

Prednisone 1 Mg Tablet [Pharmacy Med Name: Prednisone 1 Mg Tablet]

Prednisone 1 Mg Tablet [Pharmacy Med Name: Prednisone 1 Mg Tabs 1 Tab]

Prednisone 1 Mg Tablet [Pharmacy Med Name: Prednisone 1mg Tablet 1 Tablet]

Prednisone 1 Mg Tablet [Pharmacy Med Name: Prednisone 1mg Tablets]

Prednisone 1 Mg/Ml Solution

Prednisone 1 Mg/Ml Solution [Pharmacy Med Name: Prednisone 5 Mg/5 Ml Solution]

Prednisone 10 Mg Po Tabs

Prednisone 10 Mg Tab Tablet

Prednisone 10 Mg Tablet

Prednisone 10 Mg Tablet [Pharmacy Med Name: Prednisone 10 Mg Tab Cadi]

Prednisone 10 Mg Tablet [Pharmacy Med Name: Prednisone 10 Mg Tablet]

Prednisone 10 Mg Tablet [Pharmacy Med Name: Prednisone 10 Mg Tabs 10 Tab]

Prednisone 10 Mg Tablet [Pharmacy Med Name: Prednisone 10mg Tab]

Prednisone 10 Mg Tablet [Pharmacy Med Name: Prednisone 10mg** Tablets]

Prednisone 10 Mg Tablet [Pharmacy Med Name: Prednisone Oral Tablet 10 Mg]

Prednisone 2.5 Mg Po Tabs

Prednisone 2.5 Mg Tablet

Prednisone 2.5 Mg Tablet [Pharmacy Med Name: Prednisone 2.5 Mg Tablet]

Prednisone 2.5 Mg Tablet [Pharmacy Med Name: Prednisone 2.5mg Tablets]

Prednisone 20 Mg Po Tabs

Prednisone 20 Mg Tablet

Prednisone 20 Mg Tablet [Pharmacy Med Name: Prednisone 20 Mg Tab Cadi]

Prednisone 20 Mg Tablet [Pharmacy Med Name: Prednisone 20 Mg Tablet]

Prednisone 5 Mg Po Tabs

Prednisone 5 Mg Tablet

Prednisone 5 Mg Tablet [Pharmacy Med Name: Prednisone 5 Mg Tablet]

Prednisone 5 Mg Tablet [Pharmacy Med Name: Prednisone 5mg Tablet Lann #1000* 5 Tablet]

Prednisone 5 Mg Tablet [Pharmacy Med Name: Prednisone 5mg Tablet Rox #1000* 5 Tablet]

Prednisone 5 Mg Tablet [Pharmacy Med Name: Prednisone 5mg Tablets]

Prednisone 5 Mg Tablet [Pharmacy Med Name: Prednisone Tabs 5mg]

Prednisone 5 Mg/5 Ml Oral Solution

Prednisone 5 Mg/5 Ml Po Soln

Prednisone 5 Mg/Ml Concentrate

Prednisone 5 Mg/Ml Concentrate Solution

Prednisone 5 Mg/Ml Oral Concentrate

Prednisone 5 Mg/Ml Po Conc

Prednisone 50 Mg Po Tabs

Prednisone 50 Mg Tablet

Prednisone 50 Mg Tablet [Pharmacy Med Name: Prednisone 50 Mg Tablet]

Prednisone Oral

Prednisone Po

Prednisone Tab

Prednisone Tab 105 Mg

Prednisone Tab 12.5 Mg

Prednisone Tab 15 Mg

Prednisone Tab 17.5 Mg

Prednisone Tab 18.75 Mg

Prednisone Tab 180 Mg

Prednisone Tab 22.5 Mg

Prednisone Tab 25 Mg

Prednisone Tab 27.5 Mg

Prednisone Tab 30 Mg

Prednisone Tab 32.5 Mg

Prednisone Tab 35 Mg

Prednisone Tab 45 Mg

Prednisone Tab 60 Mg

Prednisone Tab 7.5 Mg

Prednisone Tablet

Prednisone Tablet 13.5 Mg

Prednisone Tablet 14 Mg

Prednisone Tablet 17 Mg

Prednisone Tablet 18 Mg

Prednisone Tablet 19 Mg

Prednisone Tablet 21 Mg

Prednisone Tablet 22 Mg

Prednisone Tablet 23 Mg

Prednisone Tablet 23.5 Mg

Prednisone Tablet 28 Mg

Prednisone Tablet 32 Mg

Prednisone Tablet 33 Mg

Sodium Chloride 0.9% Solp 100 Ml With Methylprednisolone Sodium Succinate 1,000 Mg Solr

Solu-Cortef 100 Mg Recon Soln

Solu-Cortef Act-O-Vial, Pf, 100 Mg/2 Ml Injection

Solu-Cortef Act-O-Vial, Pf, 100 Mg/2 Ml Recon Soln Injection

Solu-Cortef, Pf, 100 Mg/2 Ml Recon Soln

Solu-Cortef, Pf, 100 Mg/2 Ml Recon Soln Injection

Solu-Cortef, Pf, 250 Mg/2 Ml Recon Soln

Triamcinolone Acetonide (Kenalog) 10 Mg/Ml Inj

Triamcinolone Acetonide (Kenalog) 10 Mg/Ml Injection

Triamcinolone Acetonide (Kenalog) 40 Mg/Ml Inj

Triamcinolone Acetonide (Kenalog) 40 Mg/Ml Injection

Triamcinolone Acetonide (Kenalog-40) 40 Mg/Ml Injection

Triamcinolone Acetonide 10 Mg/Ml Inj Susp

Triamcinolone Acetonide 10 Mg/Ml Suspension For Injection

Triamcinolone Acetonide 32 Mg Intra-Artic Ssrr

Triamcinolone Acetonide 40 Mg/Ml Inj Susp

Triamcinolone Acetonide 40 Mg/Ml Suspension For Inj (Lpch-Amb Use)

Triamcinolone Acetonide 40 Mg/Ml Suspension For Injection

Triamcinolone Oral

Celexa 10 Mg Tablet

Citalopram (Celexa) 10 Mg Tablet

Citalopram (Celexa) 10 Mg Tablet [Pharmacy Med Name: Citalopram Hbr 10 Mg Tablet]

Citalopram (Celexa) 10 Mg/5 Ml Suspension

Citalopram (Celexa) 10 Mg/5 Ml Suspension [Pharmacy Med Name: Citalopram Hbr 10 Mg/5 Ml Soln]

Citalopram (Celexa) 20 Mg Tablet

Citalopram (Celexa) 20 Mg Tablet [Pharmacy Med Name: Citalopram Hbr 20 Mg Tablet]

Citalopram (Celexa) 40 Mg Tablet

Citalopram 10 Mg Po Tabs

Citalopram 10 Mg Tablet

Citalopram 20 Mg Po Tabs

Citalopram 20 Mg Tablet

Citalopram Hydrobromide (Celexa Po)

Citalopram Hydrobromide (Citalopram Oral)

Escitalopram (Lexapro) 5 Mg Tablet

Escitalopram 10 Mg Tablet

Escitalopram 20 Mg Tablet

Escitalopram 5 Mg Tablet

Escitalopram 5 Mg/5 Ml Oral Solution

Escitalopram Oxalate (Lexapro Oral)

Escitalopram Oxalate (Lexapro Po)

Escitalopram Oxalate (Lexapro) 10 Mg Tablet

Escitalopram Oxalate (Lexapro) 10 Mg Tablet [Pharmacy Med Name: Escitalopram 10 Mg Tablet 10 Tab]

Escitalopram Oxalate (Lexapro) 10 Mg Tablet [Pharmacy Med Name: Escitalopram 10 Mg Tablet]

Escitalopram Oxalate (Lexapro) 10 Mg Tablet [Pharmacy Med Name: Escitalopram 10mg Tablet 10 Tablet]

Escitalopram Oxalate (Lexapro) 10 Mg Tablet [Pharmacy Med Name: Escitalopram 10mg Tablets]

Escitalopram Oxalate (Lexapro) 10 Mg Tablet [Pharmacy Med Name: Escitalopram Oxalate 10 Mg Tab Auro]

Escitalopram Oxalate (Lexapro) 10 Mg Tablet [Pharmacy Med Name: Escitalopram Oxalate 10 Mg Tab Teva]

Escitalopram Oxalate (Lexapro) 20 Mg Tablet

Escitalopram Oxalate (Lexapro) 20 Mg Tablet [Pharmacy Med Name: Escitalopram 20 Mg Tablet]

Escitalopram Oxalate (Lexapro) 20 Mg Tablet [Pharmacy Med Name: Escitalopram 20mg Tablet Tor* 20 Tablet]

Escitalopram Oxalate (Lexapro) 20 Mg Tablet [Pharmacy Med Name: Escitalopram 20mg Tablets]

Escitalopram Oxalate (Lexapro) 20 Mg Tablet [Pharmacy Med Name: Escitalopram Oxalate 20 Mg Tab Teva]

Escitalopram Oxalate (Lexapro) 20 Mg Tabs

Escitalopram Oxalate (Lexapro) 5 Mg Tablet

Escitalopram Oxalate (Lexapro) 5 Mg Tablet [Pharmacy Med Name: Escitalopram 5 Mg Tab Solc]

Escitalopram Oxalate (Lexapro) 5 Mg Tablet [Pharmacy Med Name: Escitalopram 5 Mg Tablet]

Escitalopram Oxalate (Lexapro) 5 Mg Tablet [Pharmacy Med Name: Escitalopram 5mg Tablet 5 Tablet]

Escitalopram Oxalate (Lexapro) 5 Mg Tablet [Pharmacy Med Name: Escitalopram 5mg Tablets]

Escitalopram Oxalate (Lexapro) 5 Mg Tablet [Pharmacy Med Name: Escitalopram Oxalate 5 Mg Tab Solc]

Escitalopram Oxalate (Lexapro) 5 Mg Tablet [Pharmacy Med Name: Escitalopram Tab 5mg]

Escitalopram Oxalate (Lexapro) 5 Mg Tabs

Escitalopram Oxalate (Lexapro) 5 Mg/5 Ml Oral Solution

Escitalopram Oxalate (Lexapro) 5 Mg/5 Ml Solution

Escitalopram Oxalate (Lexapro) 5 Mg/5 Ml Solution [Pharmacy Med Name: Escitalopram 5mg/5ml Solution]

Escitalopram Oxalate (Lexapro) 5 Mg/5 Ml Solution [Pharmacy Med Name: Escitalopram Oxalate 5 Mg/5 5 Soln]

Escitalopram Oxalate (Lexapro) 5 Mg/5 Ml Solution [Pharmacy Med Name: Escitalopram Oxalate 5 Mg/5 Ml]

Escitalopram Oxalate (Lexapro) 5 Mg/5 Ml Solution [Pharmacy Med Name: Escitalopram Oxalate 5 Mg/5ml Sol Sila]

Escitalopram Oxalate 10 Mg Po Tabs

Escitalopram Oxalate 20 Mg Po Tabs

Escitalopram Oxalate 5 Mg Po Tabs

Escitalopram Oxalate 5 Mg Tablet

Escitalopram Oxalate 5 Mg/5 Ml Po Soln

Escitalopram Oxalate Oral

Escitalopram Oxalate Po

Lexapro 10 Mg Tablet

Lexapro 20 Mg Tablet

Lexapro 5 Mg Tablet

Lexapro 5 Mg Tablet [Pharmacy Med Name: Lexapro 5 Mg Tablet]

Lexapro 5 Mg Tablet [Pharmacy Med Name: Lexapro 5mg Tablets]

Paroxetine (Paxil) 10 Mg Tablet

Paroxetine (Paxil) 10 Mg/5 Ml Suspension

Paroxetine (Paxil) 20 Mg Tablet

Paroxetine (Paxil) 30 Mg Tablet

Paroxetine 20 Mg Tablet

Paroxetine Hcl (Paxil Oral)

Paroxetine Hcl (Paxil Po)

Amitriptyline (Elavil) 10 Mg Tablet

Amitriptyline (Elavil) 10 Mg Tablet [Pharmacy Med Name: Amitriptylin 10mg Tab]

Amitriptyline (Elavil) 10 Mg Tablet [Pharmacy Med Name: Amitriptyline 10mg Tablets]

Amitriptyline (Elavil) 10 Mg Tablet [Pharmacy Med Name: Amitriptyline Hcl 10 Mg Tab]

Amitriptyline (Elavil) 10 Mg Tablet [Pharmacy Med Name: Amitriptyline Hcl Oral Tablet 10 Mg]

Amitriptyline (Elavil) 10 Mg Tablet [Pharmacy Med Name: Amitriptyline Tab 10mg]

Amitriptyline (Elavil) 100 Mg Tablet

Amitriptyline (Elavil) 25 Mg Tablet

Amitriptyline (Elavil) 25 Mg Tablet [Pharmacy Med Name: Amitriptyline 25mg Tablets]

Amitriptyline (Elavil) 25 Mg Tablet [Pharmacy Med Name: Amitriptyline Hcl 25 Mg Tab Nort]

Amitriptyline (Elavil) 25 Mg Tablet [Pharmacy Med Name: Amitriptyline Hcl 25 Mg Tab]

Amitriptyline (Elavil) 50 Mg Tablet

Amitriptyline (Elavil) 50 Mg Tablet [Pharmacy Med Name: Amitriptyline Hcl 50 Mg Tab]

Amitriptyline (Elavil) 50 Mg Tablet [Pharmacy Med Name: Amitriptyline Tab 50mg Tabs]

Amitriptyline (Elavil) 75 Mg Tablet

Amitriptyline 10 Mg Po Tabs

Amitriptyline 10 Mg Tablet

Amitriptyline 100 Mg Tablet

Amitriptyline 150 Mg Tablet

Amitriptyline 25 Mg Po Tabs

Amitriptyline 25 Mg Tablet

Amitriptyline 50 Mg Po Tabs

Amitriptyline 50 Mg Tablet

Amitriptyline 75 Mg Tablet

Amitriptyline Hcl (Amitriptyline Oral)

Amitriptyline Hcl (Amitriptyline Po)

Doxepin (Silenor) 10 Mg Capsule

Doxepin (Silenor) 10 Mg/Ml Solution

Doxepin (Silenor) 50 Mg Capsule

Doxepin 10 Mg Capsule

Doxepin 10 Mg Po Caps

Imipramine (Tofranil) 10 Mg Tablet

Imipramine (Tofranil) 10 Mg Tablet [Pharmacy Med Name: Imipramine Hcl 10 Mg Tablet]

Imipramine (Tofranil) 25 Mg Tablet

Imipramine (Tofranil) 50 Mg Tablet

Imipramine (Tofranil-Pm) 100 Mg Capsule

Imipramine 25 Mg Tablet

Imipramine Hcl 25 Mg Po Tabs

Imipramine Hcl Po

Nortriptyline (Pamelor) 10 Mg Capsule

Nortriptyline (Pamelor) 10 Mg Capsule [Pharmacy Med Name: Nortriptyline Hcl 10 Mg Cap 10 Cap]

Nortriptyline (Pamelor) 10 Mg Capsule [Pharmacy Med Name: Nortriptyline Hcl 10 Mg Cap]

Nortriptyline (Pamelor) 10 Mg/5 Ml Solution

Nortriptyline (Pamelor) 25 Mg Capsule

Nortriptyline (Pamelor) 25 Mg Capsule [Pharmacy Med Name: Nortriptyline Hcl 25 Mg Cap]

Nortriptyline (Pamelor) 50 Mg Capsule

Nortriptyline (Pamelor) 50 Mg Capsule [Pharmacy Med Name: Nortriptyline Hcl 50 Mg Cap]

Nortriptyline (Pamelor) 75 Mg Capsule

Nortriptyline 10 Mg Po Caps

Nortriptyline 10 Mg/5 Ml Oral Solution

Nortriptyline 25 Mg Capsule

Nortriptyline 25 Mg Po Caps

Appendix 3. List of ICD 10 codes and CPT codes for enteral feeding tubes (37)

ICD-10 code for enteral feeding tubes

K9420

K9422

K9423

K9429

Z932

Z933

Z934

Z431

Z432

Z433

Z434

Z4651

Z4659

Z931

CPT codes for enteral feeding procedures

43246

49440

43760

43761

43762

43763

49450

44373

49440

49441

49446

49452

49460

Appendix 4. CPT codes for registered dietitian visits. (38)

97802

97803

97804
